# Supplementary material
Source: HighWire-hosted journal article supplement (doi:10.1101/rna.079030.121)
Supplement: Supplemental_Legends.docx [file Supplemental_Legends.docx]

**Supplementary Figure 1 Activated cell inputs for Ago2 IPs and for preparation of small RNA libraries from HMW and LMW RISC**

(A) Western blot of total lysates used for time course of Ago2 immunoprecipitates in Fig. 1. (B-C) Western blots from input, Ago2 IP (and control IgG IP) and unbound fractions from naïve (B) and d2 activated (C) OT-I T cells. Blots are probed with Ago2 and GW182 antibodies. The 2 isoforms TNGW1 and GW182 recognised by the anti-GW182 sera are indicated. Three biological replicates are shown for naïve and activated cells. (D) Western blot from protein fractions eluted by size exclusion chromatography, probed with Ago2 antibody. One replicate is shown as representative of three. (E) Western blot of Ago2 IP from pooled HMW (lanes 2-3 in D) and LMW (lanes 10-12 in D) fractions, probed with Ago2 and GW182 antibodies. Three biological replicates are shown.

**Supplementary Figure 2 miRNA expression changes dynamically upon CD8+ T cell activation**

(A) Differential expression of Ago2 bound miRNAs between naïve and d2 activated OT-I T cells shown in a volcano plot of log2 fold change expression in naïve vs activated cells and -log10 of false discovery rate. Significant differences (FDR<0.01) above dashed line. Data are from three biological replicates in one experiment.

(B-C) miRNA expression measured by qPCR shown as fold expression relative to naïve cells. Mean and SD from 3-4 independent experiments.

**Supplementary Figure 3 Reference miRNAs are more abundant in HMW compared to LMW RISC and partitioning is consistent across family members**

A) Reference miRNAs are more abundant than isomiRs in HMW compared to LMW libraries. Bars represent the percentage of all miRNA-related reads after processing with the isomiRs R package v1.26.0. Reference miRNAs are those defined by miRBase release 22.1, isomiRs include 5’ or 3’ extensions or reductions, non-template additions as well as single nucleotide variations. Statistical significance was calculated with a Welch two sample t-test comparing the percentage of isomiRs in HMW vs LMW.

(B) Differential expression of miRNAs between HMW and LMW RISC shown in a volcano plot. The x axis corresponds to the log2 (Fold-change) of miRNAs in HMW vs LMW RISC and the y axis corresponds to the -log10 of the False Discovery Rate. Significant differences (FDR<0.01) are above the dashed line. Members of the miR-17 family (in blue: miR-17-5p, miR-20a-5p, miR-20b-5p, miR-106a-5p, miR-106b-5p and miR-93-5p), let-7 family (in green: let-7a-5p, let-7b-5p, let-7c-5p, let-7d-5p, let-7e-5p, let-7f-5p, let-7g-5p, let-7i-5p, let-7j) and miR-449 family (in orange: miR-449a-5p, miR-449c-5p, miR-34a-5p) are highlighted. (C) Absolute expression (in CPM) of miRNAs belonging to miR-17, miR-449 and let-7 families in HMW vs LMW RISC (left) and in Ago2 IP from naïve d0 vs activated d2 cells (right). Each data point is the average from three biological replicates in one experiment.

**Supplementary Figure 4 Uptake of the miR-7 inhibitor does not affect cell viability, proliferation and size**

(A-B) Cells were activated with SIINFEKL peptide in the presence of a fluorescently tagged miR-7 inhibitor (miR-7-FAM). Uptake was measured by flow cytometry on d1 and d2 (A), with or without a pre-incubation with trypsin, which removes CD8β from the cell surface, but not the inhibitor (B). (C) Percentage of live cells on d2 measured using a live/dead cell stain. (D) Cell proliferation measured by dilution of a CellTrace tracker dye on d2. Representative flow cytometry histogram is shown alongside proliferation index measured from three independent experiments. Statistical analysis for (C) and (D) and was performed using a one-way ANOVA with Tukey’s multiple comparisons test. (E) Cell size measured by the increase in forward scatter in flow cytometry, is shown relative to ‘no inhibitor’ control. Graph is showing individual biological replicates from 4-6 independent experiments, with fold expression shown relative to ‘no inhibitor’ control. (F) Cells were activated with SIINFEKL peptide in the presence of miR-7 inhibitor and expression of surface markers was measured on d1. Graphs show individual biological replicates pooled from three independent experiments, with fold expression shown relative to ‘no inhibitor’ control. Statistical analysis for (E) and (F) was performed using a one-sample t-test to compare ‘miR-7 inhibitor’ to the hypothetical mean of 1 and a two-tailed unpaired student’s t-test to compare ‘control inhibitor’ and ‘miR-7 inhibitor’ conditions. (G) Cells were activated with SIINFEKL peptide on d0 and JAK inhibitor was added on d1. Expression of surface markers and transcription factors was measured on d2. Representative flow cytometry histograms (from four independent experiments) show effect of JAK inhibitor compared to no inhibitor control.

Supplementary Table 1: HMW enriched miRNAs as determined by differential expression analysis in Degust.

Supplementary Table 2: LMW enriched miRNAs as determined by differential expression analysis in Degust.
